# Supplementary material for: The Transcriptional Repressor ZBTB4 Regulates EZH2 Through a MicroRNA-ZBTB4-Specificity Protein Signaling Axis
Source: PubMed Central journal article supplement — Neoplasia. 2014 Dec 9;16(12):1059–69. doi: 10.1016/j.neo.2014.09.011 (PMC4309261; doi:10.1016/j.neo.2014.09.011), 2014-12-09

**Supplementary Table 1.** Pearson's r correlation analysis using NKI and UNC data sets identified 34 genes the most inversely correlated with ZBTB4 expression

| Gene Symbol   | Description                                                                        | r (NKI, N=295) | p value | r (UNC, N=500) | p value |
|---------------|------------------------------------------------------------------------------------|----------------|---------|----------------|---------|
| BIRC5         | Baculoviral IAP repeat-containing 5 (survivin)                                     | -0.598         | 0       | -0.481         | 0       |
| BLM           | Bloom syndrome                                                                     | -0.527         | 0       | -0.506         | 0       |
| BM039         | Uncharacterized bone marrow protein BM039                                          | -0.538         | 0       | -0.532         | 0       |
| BUB1          | BUB1 budding uninhibited by benzimidazoles 1 homolog (yeast)                       | -0.518         | 0       | -0.572         | 0       |
| CCNA2         | Cyclin A2                                                                          | -0.577         | 0       | -0.536         | 0       |
| CCNB1         | Cyclin B1                                                                          | -0.503         | 0       | -0.484         | 0       |
| CCNB2         | Cyclin B2                                                                          | -0.588         | 0       | -0.587         | 0       |
| CDC2          | Cell division cycle 2, G1 to S and G2 to M                                         | -0.479         | 0       | -0.54          | 0       |
| CDC20         | CDC20 cell division cycle 20 homolog (S. cerevisiae)                               | -0.572         | 0       | -0.548         | 0       |
| CDC45L        | CDC45 cell division cycle 45-like (S. cerevisiae)                                  | -0.563         | 0       | -0.516         | 0       |
| CDC6          | CDC6 cell division cycle 6 homolog (S. cerevisiae)                                 | -0.475         | 0       | -0.465         | 0       |
| CDKN3         | Cyclin-dependent kinase inhibitor 3 (CDK2-associated dual specificity phosphatase) | -0.477         | 0       | -0.473         | 0       |
| CENPA         | Centromere protein A, 17kDa                                                        | -0.58          | 0       | -0.539         | 0       |
| CHEK1         | CHK1 checkpoint homolog (S. pombe)                                                 | -0.491         | 0       | -0.605         | 0       |
| DC13          | DC13 protein                                                                       | -0.477         | 0       | -0.452         | 0       |
| DKFZp762E1312 | Hypothetical protein DKFZp762E1312                                                 | -0.58          | 0       | -0.484         | 0       |
| E2F1          | E2F transcription factor 1                                                         | -0.58          | 0       | -0.494         | 0       |
| EXO1          | Exonuclease 1                                                                      | -0.537         | 0       | -0.563         | 0       |
| EZH2          | Enhancer of zeste homolog 2 (Drosophila)                                           | -0.47          | 0       | -0.456         | 0       |
| FLJ10156      | Hypothetical protein FLJ10156                                                      | -0.474         | 0       | -0.476         | 0       |
| GTSE1         | G-2 and S-phase expressed 1                                                        | -0.473         | 0       | -0.484         | 0       |
| LRP8          | Low density lipoprotein receptor-related protein 8, apolipoprotein e receptor      | -0.488         | 0       | -0.507         | 0       |
| MAD2L1        | MAD2 mitotic arrest deficient-like 1 (yeast)                                       | -0.578         | 0       | -0.474         | 0       |
| MYBL2         | V-myb myeloblastosis viral oncogene homolog (avian)-like 2                         | -0.559         | 0       | -0.497         | 0       |
| ORC6L         | Origin recognition complex, subunit 6 homolog-like (yeast)                         | -0.588         | 0       | -0.47          | 0       |
| PTTG2         | Pituitary tumor-transforming 2                                                     | -0.589         | 0       | -0.501         | 0       |
| RAD51         | RAD51 homolog (RecA homolog, E. coli) (S. cerevisiae)                              | -0.514         | 0       | -0.462         | 0       |
| RAD54L        | RAD54-like (S. cerevisiae)                                                         | -0.493         | 0       | -0.469         | 0       |
| RANBP1        | RAN binding protein 1                                                              | -0.488         | 0       | -0.461         | 0       |
| RRM2          | Ribonucleotide reductase M2 polypeptide                                            | -0.52          | 0       | -0.51          | 0       |
| SNRPC         | Small nuclear ribonucleoprotein polypeptide C                                      | -0.453         | 0       | -0.454         | 0       |
| STK6          | Serine/threonine kinase 6                                                          | -0.479         | 0       | -0.495         | 0       |
| TRIP13        | Thyroid hormone receptor interactor 13                                             | -0.55          | 0       | -0.458         | 0       |
| TTK           | TTK protein kinase                                                                 | -0.556         | 0       | -0.568         | 0       |

## Supplementary Table 2. Common 163 genes regulated after Sp1 and EZH2 knockdown in MDA-MB-231 cells

| Gene Symbol | Description                                                                                               | Sp1 KO/Fold Change | EZH2 KO/ Fold Change |
|-------------|-----------------------------------------------------------------------------------------------------------|--------------------|----------------------|
| TNFSF18     | tumor necrosis factor (ligand) superfamily, member 18 (TNFSF18).                                          | 0.42               | 0.74                 |
| CENPA       | centromere protein A (CENPA).                                                                             | 0.45               | 0.71                 |
| TYMS        | thymidylate synthetase (TYMS).                                                                            | 0.47               | 0.72                 |
| LTB         | lymphotoxin beta (TNF superfamily, member 3) (LTB).                                                       | 0.47               | 0.63                 |
| IL6         | interleukin 6 (interferon, beta 2) (IL6).                                                                 | 0.49               | 0.58                 |
| EVI2A       | ecotropic viral integration site 2A (EVI2A).                                                              | 0.50               | 0.55                 |
| PLOD2       | procollagen-lysine, 2-oxoglutarate 5-dioxygenase 2 (PLOD2).                                               | 0.51               | 0.54                 |
| DMBT1       | deleted in malignant brain tumors 1 (DMBT1).                                                              | 0.52               | 0.69                 |
| ADD3        | adducin 3 (gamma) (ADD3).                                                                                 | 0.56               | 0.75                 |
| CDC25C      | cell division cycle 25 homolog C (S. pombe) (CDC25C).                                                     | 0.57               | 0.64                 |
| LXN         | latexin (LXN).                                                                                            | 0.58               | 0.71                 |
| GSTM2       | glutathione S-transferase M2 (muscle) (GSTM2).                                                            | 0.58               | 0.79                 |
| ARHGDI1B    | Rho GDP dissociation inhibitor (GDI) beta (ARHGDI1B).                                                     | 0.59               | 0.79                 |
| TMPO        | thymopoietin (TMPO).                                                                                      | 0.61               | 0.67                 |
| EIF5        | eukaryotic translation initiation factor 5 (EIF5).                                                        | 0.62               | 0.73                 |
| CAT         | catalase (CAT).                                                                                           | 0.63               | 0.48                 |
| AKAP12      | A kinase (PRKA) anchor protein (gravin) 12 (AKAP12).                                                      | 0.63               | 0.73                 |
| INSIG1      | insulin induced gene 1 (INSIG1).                                                                          | 0.64               | 0.67                 |
| DUSP6       | dual specificity phosphatase 6 (DUSP6).                                                                   | 0.65               | 0.68                 |
| ALDOA       | aldolase A, fructose-bisphosphate (ALDOA).                                                                | 0.65               | 0.68                 |
| KRT18       | keratin 18 (KRT18).                                                                                       | 0.65               | 0.79                 |
| NFE2L3      | nuclear factor (erythroid-derived 2)-like 3 (NFE2L3).                                                     | 0.65               | 0.80                 |
| IGFBP7      | insulin-like growth factor binding protein 7 (IGFBP7).                                                    | 0.66               | 0.72                 |
| TGM2        | transglutaminase 2 (C polypeptide, protein-glutamine-gamma-glutamyltransferase) (TGM2).                   | 0.66               | 0.67                 |
| HERPUD1     | homocysteine-inducible, endoplasmic reticulum stress-inducible, ubiquitin-like domain member 1 (HERPUD1). | 0.66               | 0.78                 |
| GABPB2      | GA binding protein transcription factor, beta subunit 2 (GABPB2).                                         | 0.66               | 0.76                 |
| HSD17B4     | hydroxysteroid (17-beta) dehydrogenase 4 (HSD17B4).                                                       | 0.67               | 0.79                 |
| EZH2        | enhancer of zeste homolog 2 (Drosophila) (EZH2).                                                          | 0.67               | 0.40                 |
| MAT2B       | methionine adenosyltransferase II, beta (MAT2B).                                                          | 0.67               | 0.63                 |
| VAMP4       | vesicle-associated membrane protein 4 (VAMP4).                                                            | 0.67               | 0.79                 |
| PCNA        | proliferating cell nuclear antigen (PCNA).                                                                | 0.67               | 0.77                 |
| MCL1        | myeloid cell leukemia sequence 1 (BCL2-related) (MCL1).                                                   | 0.67               | 0.62                 |
| RRM2        | ribonucleotide reductase M2 polypeptide (RRM2).                                                           | 0.67               | 0.65                 |
| CALD1       | caldesmon 1 (CALD1).                                                                                      | 0.68               | 0.70                 |
| SERPINI1    | serpin peptidase inhibitor, clade I (neuroserpin), member 1 (SERPINI1).                                   | 0.68               | 0.76                 |
| CKAP2       | cytoskeleton associated protein 2 (CKAP2).                                                                | 0.69               | 0.68                 |
| CRIM1       | cysteine rich transmembrane BMP regulator 1 (chordin-like) (CRIM1).                                       | 0.69               | 0.57                 |
| ZNF187      | zinc finger protein 187 (ZNF187).                                                                         | 0.69               | 0.71                 |
| HMBS        | hydroxymethylbilane synthase (HMBS).                                                                      | 0.69               | 0.68                 |
| ITM2B       | integral membrane protein 2B (ITM2B).                                                                     | 0.69               | 0.66                 |
| IDH1        | isocitrate dehydrogenase 1 (NADP+), soluble (IDH1).                                                       | 0.70               | 0.53                 |
| TGFB2       | transforming growth factor, beta 2 (TGFB2).                                                               | 0.70               | 0.77                 |
| IFNGR1      | interferon gamma receptor 1 (IFNGR1).                                                                     | 0.70               | 0.78                 |
| SREBF1      | sterol regulatory element binding transcription factor 1 (SREBF1).                                        | 0.70               | 0.78                 |
| CTH         | cystathionase (cystathionine gamma-lyase) (CTH).                                                          | 0.70               | 0.67                 |
| EHF         | ets homologous factor (EHF).                                                                              | 0.70               | 0.64                 |
| IL8         | interleukin 8 (IL8).                                                                                      | 0.71               | 0.60                 |
| MAP4K2      | mitogen-activated protein kinase kinase kinase kinase 2 (MAP4K2).                                         | 0.71               | 0.73                 |
| CTGF        | connective tissue growth factor (CTGF).                                                                   | 0.71               | 0.72                 |
| RFC3        | replication factor C (activator 1) 3, 38kDa (RFC3).                                                       | 0.71               | 0.66                 |
| TJP2        | tight junction protein 2 (zona occludens 2) (TJP2).                                                       | 0.71               | 0.74                 |
| RAB22A      | RAB22A, member RAS oncogene family (RAB22A).                                                              | 0.72               | 0.69                 |
| FUCA1       | fucosidase, alpha-L- 1, tissue (FUCA1).                                                                   | 0.72               | 0.77                 |
| BMPR2       | bone morphogenetic protein receptor, type II (serine/threonine kinase) (BMPR2).                           | 0.72               | 0.70                 |

## Supplementary Table 2. continued

|         |                                                                                                                  |      |      |
|---------|------------------------------------------------------------------------------------------------------------------|------|------|
| SH3BGR1 | SH3 domain binding glutamic acid-rich protein like (SH3BGR1).                                                    | 0.72 | 0.66 |
| DAB2    | disabled homolog 2, mitogen-responsive phosphoprotein ( <i>Drosophila</i> ) (DAB2).                              | 0.72 | 0.80 |
| CACYBP  | calyculin binding protein (CACYBP).                                                                              | 0.72 | 0.65 |
| RCN2    | reticulocalbin 2, EF-hand calcium binding domain (RCN2).                                                         | 0.72 | 0.68 |
| SSFA2   | sperm specific antigen 2 (SSFA2).                                                                                | 0.73 | 0.65 |
| SNX5    | sorting nexin 5 (SNX5).                                                                                          | 0.73 | 0.53 |
| LBR     | lamin B receptor (LBR).                                                                                          | 0.73 | 0.60 |
| IKBK1   | inhibitor of kappa light polypeptide gene enhancer in B-cells, kinase gamma (IKBK1).                             | 0.73 | 0.79 |
| PE1     | peroxisomal D3,D2-enoyl-CoA isomerase (PE1).                                                                     | 0.73 | 0.73 |
| AUH     | AU RNA binding protein/enoyl-Coenzyme A hydratase (AUH), nuclear gene encoding mitochondrial protein.            | 0.73 | 0.68 |
| LAMP2   | lysosomal-associated membrane protein 2 (LAMP2).                                                                 | 0.74 | 0.66 |
| RFC4    | replication factor C (activator 1) 4, 37kDa (RFC4).                                                              | 0.74 | 0.72 |
| PSMA1   | proteasome (prosome, macropain) subunit, alpha type, 1 (PSMA1).                                                  | 0.75 | 0.69 |
| MCRS1   | microspherule protein 1 (MCRS1).                                                                                 | 0.75 | 0.73 |
| PAWR    | PRKC, apoptosis, WT1, regulator (PAWR).                                                                          | 0.75 | 0.67 |
| YME1L1  | YME1-like 1 ( <i>S. cerevisiae</i> ) (YME1L1), nuclear gene encoding mitochondrial protein.                      | 0.75 | 0.78 |
| F3      | coagulation factor III (thromboplastin, tissue factor) (F3).                                                     | 0.75 | 0.67 |
| HNMT    | histamine N-methyltransferase (HNMT).                                                                            | 0.76 | 0.58 |
| IGFBP1  | insulin-like growth factor binding protein 1 (IGFBP1).                                                           | 0.76 | 0.38 |
| CLIC4   | chloride intracellular channel 4 (CLIC4), nuclear gene encoding mitochondrial protein.                           | 0.76 | 0.63 |
| NR4A2   | nuclear receptor subfamily 4, group A, member 2 (NR4A2).                                                         | 0.76 | 0.58 |
| ULK1    | omo sapiens unc-51-like kinase 1 ( <i>C. elegans</i> ) (ULK1).                                                   | 0.76 | 0.80 |
| FDFT1   | farnesyl-diphosphate farnesyltransferase 1 (FDFT1).                                                              | 0.76 | 0.63 |
| SOD2    | superoxide dismutase 2, mitochondrial (SOD2), nuclear gene encoding mitochondrial protein.                       | 0.77 | 0.77 |
| NEDD1   | neural precursor cell expressed, developmentally down-regulated 1 (NEDD1).                                       | 0.77 | 0.73 |
| FIGN1   | fidgetin-like 1 (FIGN1).                                                                                         | 0.77 | 0.69 |
| ACTG1   | actin, gamma 1 (ACTG1).                                                                                          | 0.77 | 0.40 |
| OIP5    | Opa interacting protein 5 (OIP5).                                                                                | 0.77 | 0.65 |
| EFEMP1  | EGF-containing fibulin-like extracellular matrix protein 1 (EFEMP1).                                             | 0.77 | 0.73 |
| MRPL3   | mitochondrial ribosomal protein L3 (MRPL3), nuclear gene encoding mitochondrial protein.                         | 0.78 | 0.69 |
| BIRC2   | baculoviral IAP repeat-containing 2 (BIRC2).                                                                     | 0.78 | 0.75 |
| CRIP1   | cysteine-rich PDZ-binding protein (CRIP1).                                                                       | 0.78 | 0.71 |
| PTP4A2  | omo sapiens protein tyrosine phosphatase type IVA, member 2, transcript variant 9 (PTP4A2).                      | 0.78 | 0.78 |
| BMP4    | bone morphogenetic protein 4 (BMP4).                                                                             | 0.78 | 0.61 |
| RBBP9   | retinoblastoma binding protein 9 (RBBP9).                                                                        | 0.78 | 0.80 |
| PHYH    | phytanoyl-CoA 2-hydroxylase (PHYH).                                                                              | 0.78 | 0.76 |
| EBAG9   | estrogen receptor binding site associated, antigen, 9 (EBAG9).                                                   | 0.78 | 0.53 |
| CEPT1   | choline/ethanolamine phosphotransferase 1 (CEPT1).                                                               | 0.79 | 0.73 |
| ITGB1   | integrin, beta 1 (fibronectin receptor, beta polypeptide, antigen CD29 includes MDF2, MSK12) (ITGB1).            | 0.79 | 0.63 |
| PSMC1   | proteasome (prosome, macropain) 26S subunit, ATPase, 1 (PSMC1).                                                  | 0.79 | 0.63 |
| IDS     | iduronate 2-sulfatase (Hunter syndrome) (IDS).                                                                   | 0.79 | 0.76 |
| FER1L3  | fer-1-like 3, myoferlin ( <i>C. elegans</i> ) (FER1L3).                                                          | 0.79 | 0.74 |
| NUP54   | nucleoporin 54kDa (NUP54).                                                                                       | 0.79 | 0.64 |
| SHMT1   | serine hydroxymethyltransferase 1 (soluble) (SHMT1).                                                             | 0.79 | 0.76 |
| ABC9    | ATP-binding cassette, sub-family B (MDR/TAP), member 9 (ABC9).                                                   | 0.79 | 0.80 |
| MST1    | macrophage stimulating 1 (hepatocyte growth factor-like) (MST1).                                                 | 0.79 | 0.76 |
| MGAT2   | mannosyl (alpha-1,6-)-glycoprotein beta-1,2-N-acetylglucosaminyltransferase (MGAT2).                             | 0.80 | 0.60 |
| ATP2C1  | ATPase, Ca <sup>++</sup> transporting, type 2C, member 1 (ATP2C1).                                               | 0.80 | 0.64 |
| XBP1    | X-box binding protein 1 (XBP1).                                                                                  | 0.80 | 0.67 |
| PLEK2   | pleckstrin 2 (PLEK2).                                                                                            | 1.26 | 1.46 |
| PPP2R2A | protein phosphatase 2 (formerly 2A), regulatory subunit B, alpha isoform (PPP2R2A).                              | 1.26 | 1.38 |
| SAA1    | serum amyloid A1 (SAA1).                                                                                         | 1.26 | 1.30 |
| NDUF2   | NADH dehydrogenase (ubiquinone) 1 beta subcomplex, 2, 8kDa (NDUF2), nuclear gene encoding mitochondrial protein. | 1.26 | 1.26 |
| IL1RL1  | interleukin 1 receptor-like 1 (IL1RL1).                                                                          | 1.26 | 1.41 |
| S100A13 | S100 calcium binding protein A13 (S100A13).                                                                      | 1.27 | 1.45 |

## Supplementary Table 2. continued

|          |                                                                                                                      |      |      |
|----------|----------------------------------------------------------------------------------------------------------------------|------|------|
| ZNF275   | zinc finger protein 275 (ZNF275).                                                                                    | 1.27 | 1.26 |
| CDS2     | CDP-diacylglycerol synthase (phosphatidate cytidylyltransferase) 2 (CDS2).                                           | 1.28 | 1.33 |
| RNF24    | ring finger protein 24 (RNF24).                                                                                      | 1.29 | 1.38 |
| CCT6A    | chaperonin containing TCP1, subunit 6A (zeta 1) (CCT6A).                                                             | 1.30 | 1.30 |
| SRP68    | signal recognition particle 68kDa (SRP68).                                                                           | 1.30 | 1.38 |
| RBM3     | RNA binding motif (RNP1, RRM) protein 3 (RBM3).                                                                      | 1.31 | 1.54 |
| PLAGL2   | pleiomorphic adenoma gene-like 2 (PLAGL2).                                                                           | 1.32 | 1.53 |
| ACADVL   | acyl-Coenzyme A dehydrogenase, very long chain (ACADVL).                                                             | 1.32 | 1.25 |
| ATIC     | 5-aminoimidazole-4-carboxamide ribonucleotide formyltransferase/IMP cyclohydrolase (ATIC).                           | 1.33 | 1.68 |
| MKNK1    | MAP kinase interacting serine/threonine kinase 1 (MKNK1).                                                            | 1.33 | 1.49 |
| ABCD1    | ATP-binding cassette, sub-family D (ALD), member 1 (ABCD1).                                                          | 1.33 | 1.53 |
| ELAVL1   | ELAV (embryonic lethal, abnormal vision, Drosophila)-like 1 (Hu antigen R) (ELAVL1).                                 | 1.34 | 1.37 |
| TNRC15   | trinucleotide repeat containing 15 (TNRC15).                                                                         | 1.34 | 1.48 |
| SLC29A1  | solute carrier family 29 (nucleoside transporters), member 1 (SLC29A1), nuclear gene encoding mitochondrial protein. | 1.35 | 1.36 |
| SUPT5H   | suppressor of Ty 5 homolog ( <i>S. cerevisiae</i> ) (SUPT5H).                                                        | 1.35 | 1.98 |
| VHL      | von Hippel-Lindau tumor suppressor (VHL).                                                                            | 1.36 | 1.51 |
| PKD1     | polycystic kidney disease 1 (autosomal dominant) (PKD1).                                                             | 1.36 | 1.92 |
| WDR6     | WD repeat domain 6 (WDR6).                                                                                           | 1.37 | 1.59 |
| SLC5A6   | solute carrier family 5 (sodium-dependent vitamin transporter), member 6 (SLC5A6).                                   | 1.38 | 1.50 |
| HSBP1    | heat shock factor binding protein 1 (HSBP1).                                                                         | 1.38 | 1.37 |
| GNB4     | guanine nucleotide binding protein (G protein), beta polypeptide 4 (GNB4).                                           | 1.38 | 1.31 |
| BNIP1    | BCL2/adenovirus E1B 19kDa interacting protein 1 (BNIP1).                                                             | 1.38 | 1.36 |
| NXF1     | nuclear RNA export factor 1 (NXF1).                                                                                  | 1.39 | 1.45 |
| KIAA0427 | KIAA0427 (KIAA0427).                                                                                                 | 1.39 | 1.43 |
| EPHB4    | EPH receptor B4 (EPHB4).                                                                                             | 1.40 | 1.38 |
| RBMS1    | RNA binding motif, single stranded interacting protein 1 (RBMS1).                                                    | 1.42 | 1.44 |
| HIVEP1   | human immunodeficiency virus type I enhancer binding protein 1 (HIVEP1).                                             | 1.44 | 1.39 |
| TXNL2    | thioredoxin-like 2 (TXNL2).                                                                                          | 1.44 | 1.37 |
| KIAA1545 | omo sapiens KIAA1545 protein (KIAA1545).                                                                             | 1.45 | 1.37 |
| PEMT     | phosphatidylethanolamine N-methyltransferase (PEMT), nuclear gene encoding mitochondrial protein.                    | 1.45 | 1.27 |
| MAT2A    | methionine adenosyltransferase II, alpha (MAT2A).                                                                    | 1.47 | 1.45 |
| MTF1     | metal-regulatory transcription factor 1 (MTF1).                                                                      | 1.47 | 1.71 |
| ZNF35    | zinc finger protein 35 (ZNF35).                                                                                      | 1.48 | 1.30 |
| PABPN1   | poly(A) binding protein, nuclear 1 (PABPN1).                                                                         | 1.48 | 1.37 |
| EIF2C2   | eukaryotic translation initiation factor 2C, 2 (EIF2C2).                                                             | 1.50 | 1.26 |
| POLRMT   | polymerase (RNA) mitochondrial (DNA directed) (POLRMT), nuclear gene encoding mitochondrial protein.                 | 1.53 | 1.42 |
| SEC24C   | SEC24 family, member C ( <i>S. cerevisiae</i> ) (SEC24C).                                                            | 1.54 | 1.39 |
| ATOX1    | ATX1 antioxidant protein 1 homolog (yeast) (ATOX1).                                                                  | 1.54 | 1.39 |
| SRI      | sorcin (SRI), transcript variant 1, mRNA.                                                                            | 1.54 | 0.78 |
| FLNC     | filamin C, gamma (actin binding protein 280) (FLNC).                                                                 | 1.55 | 1.43 |
| ID3      | inhibitor of DNA binding 3, dominant negative helix-loop-helix protein (ID3).                                        | 1.57 | 1.55 |
| ZIC2     | Zic family member 2 (odd-paired homolog, Drosophila) (ZIC2).                                                         | 1.57 | 1.32 |
| FZD4     | frizzled homolog 4 (Drosophila) (FZD4).                                                                              | 1.58 | 1.40 |
| WHSC2    | Wolf-Hirschhorn syndrome candidate 2 (WHSC2).                                                                        | 1.60 | 1.63 |
| LHFPL2   | lipoma HMGIC fusion partner-like 2 (LHFPL2).                                                                         | 1.64 | 1.45 |
| FGFRL1   | fibroblast growth factor receptor-like 1 (FGFRL1).                                                                   | 1.67 | 1.27 |
| SPHK1    | sphingosine kinase 1 (SPHK1).                                                                                        | 1.76 | 1.36 |
| IFITM3   | interferon induced transmembrane protein 3 (1-8U) (IFITM3).                                                          | 1.85 | 1.29 |
| IFIT1    | interferon-induced protein with tetratricopeptide repeats 1 (IFIT1).                                                 | 1.86 | 1.43 |
| CH25H    | cholesterol 25-hydroxylase (CH25H).                                                                                  | 2.01 | 1.32 |
| PI3      | peptidase inhibitor 3, skin-derived (SKALP) (PI3).                                                                   | 2.04 | 1.60 |
| HSPA8    | heat shock 70kDa protein 8 (HSPA8).                                                                                  | 2.17 | 1.26 |
| CDC25A   | cell division cycle 25 homolog A ( <i>S. pombe</i> ) (CDC25A).                                                       | 2.26 | 1.62 |
| RPL28    | ribosomal protein L28 (RPL28).                                                                                       | 3.04 | 1.37 |

**Supplementary Table 3.** Functional categories by DAVID analysis using Sp1/EZH2 common 163 gene signature.

| Term                                                              | Count | P Value  | Fold Enrichment | Bonferroni | Benjamini | FDR   |
|-------------------------------------------------------------------|-------|----------|-----------------|------------|-----------|-------|
| GO:0010941~regulation of cell death                               | 22    | 1.17E-04 | 2.55            | 0.16       | 0.08      | 0.19  |
| GO:0042981~regulation of apoptosis                                | 21    | 2.74E-04 | 2.47            | 0.34       | 0.10      | 0.45  |
| GO:0043067~regulation of programmed cell death                    | 21    | 3.12E-04 | 2.45            | 0.37       | 0.09      | 0.52  |
| GO:0010033~response to organic substance                          | 20    | 1.91E-04 | 2.62            | 0.25       | 0.09      | 0.32  |
| GO:0042127~regulation of cell proliferation                       | 19    | 0.0015   | 2.28            | 0.89       | 0.17      | 2.44  |
| GO:0010604~positive regulation of macromolecule metabolic process | 16    | 0.0354   | 1.77            | 1.00       | 0.57      | 45.01 |
| GO:0016265~death                                                  | 15    | 0.0199   | 1.96            | 1.00       | 0.50      | 28.38 |
| GO:0007049~cell cycle                                             | 15    | 0.0334   | 1.83            | 1.00       | 0.56      | 43.09 |
| GO:0008219~cell death                                             | 14    | 0.0391   | 1.84            | 1.00       | 0.58      | 48.42 |
| GO:0008285~negative regulation of cell proliferation              | 13    | 4.20E-04 | 3.41            | 0.47       | 0.10      | 0.70  |

**Supplementary Table 4.** The result from seven different prediction algorithm analysis

| <b>Prediction Algorithm</b> | <b>1NN</b> | <b>3NN</b> | <b>NC</b> | <b>SVM</b> | <b>BAS</b> | <b>CCP</b> | <b>LDA</b> |
|-----------------------------|------------|------------|-----------|------------|------------|------------|------------|
| p Value                     | 0.00503    | 0.0113     | 0.000351  | 0.0451     | 0.112      | 0.214      | 0.252      |

**Supplementary Figure 1.** Both Sp1 and EZH2 are highly expressed in invasive breast carcinoma vs. normal breast whereas ZBTB4 expression is low in two independent breast cancer data sets.

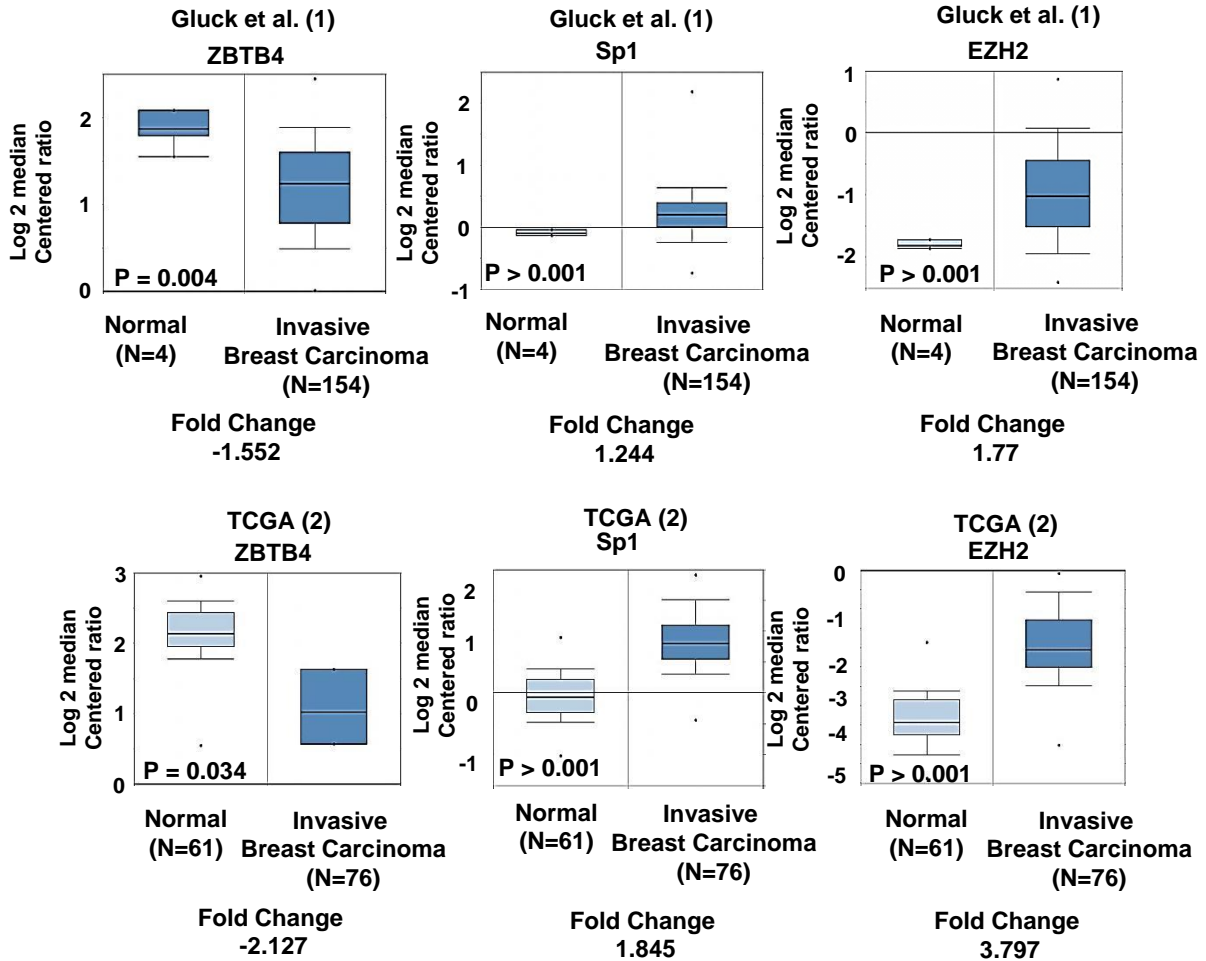

1. Glück S, Ross JS, Royce M, McKenna EF Jr, Perou CM, Avisar E, Wu L. TP53 genomics predict higher clinical and pathologic tumor response in operable early-stage breast cancer treated with docetaxel-capecitabine ± trastuzumab. *Breast Cancer Res Treat.* 2012 Apr;132(3):781-91.

2. The Cancer Genome Atlas - Invasive Breast Carcinoma Gene Expression Data (TCGA). The Cancer Genome Atlas, Office of Cancer Genomics, National Cancer Institute, National Institutes of Health, Bethesda, MD 20892. (<http://tcga-data.nci.nih.gov/tcga/>).

**Supplementary Figure 2.** Knockdown of EZH2 by RNAi (siEZH2) decreased MDA-MB-231 cell growth (A) and invasion (B) compared to cells transfected with a control non-specific oligonucleotide (siCT). Significantly ( $p < 0.05$ ) decreased responses are indicated (\*\*).

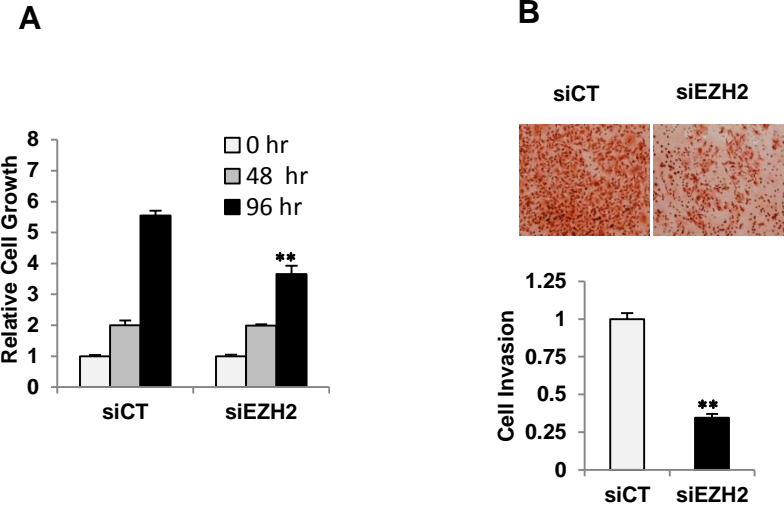



**Supplementary Figure 3.** GC-rich Sp1 sites in EZH2 promoter region.  
Sp1 consensus sequence shown as red color.

**EZH2 promoter**

**Wild type**

Sp1                      Sp1

- 458    ACTTGGCTTCCAGCACCCGCCCCGCCCCTCCCCCGCCCCGGGAACTCTGCGGCGCCG - 382  
          TGAACCGAAGGTCGTGGGCGGGGCGGGGAGGGGGCGGGCCCTTGAGACGCCGCGGC

**Mutant**

Sp1                      Sp1

- 458    ACTTGGCTTCCAGCACCCGAAAAGCTTCTCAACGTTGCGGAACTCTGCGGCGCCG - 382  
          TGAACCGAAGGTCGTGGGCTTTTCGAAGAGGTTGCAAGCCCTTGAGACGCCGCGGC

**Supplementary Figure 4.** Competition between Sp1 and ZBTB4 to GC-rich Sp1 sites in EZH2 promoter region.

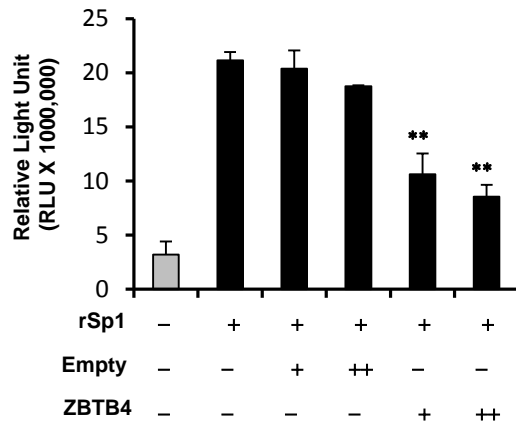

**Supplementary Figure 5.** Increased expression of ZBTB4 after transfection of antagomiRs in MCF-7 and MDA-MB-231 cells.

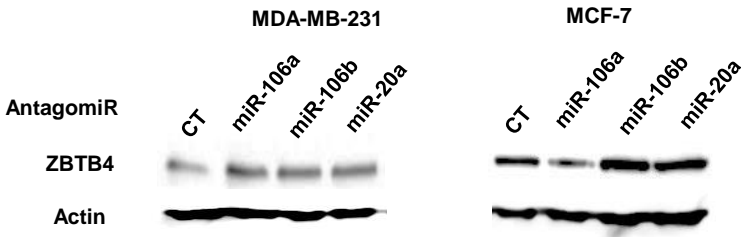

**Supplementary Figure 6.** Different expression Levels of miR-106a, miR-106b and miR-20a in MCF-7 and MDA-MB-231 cells.

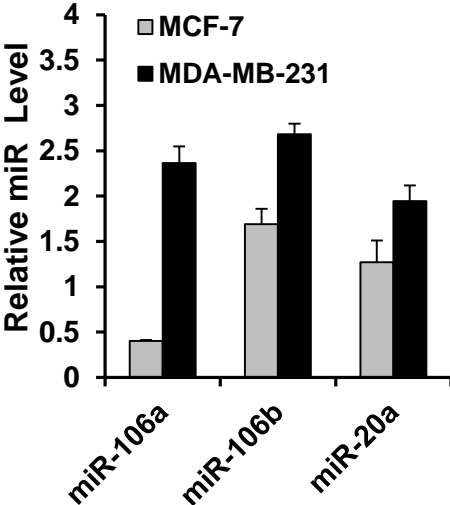

**Supplementary Figure 7.** Pierson's correlation analysis using NCI60 cell line miR and mRNA data sets (<http://discover.nci.nih.gov/cellminer/home.do>) (  $r$ = coefficient value). Positive correlation between EZH2 and oncogenic miRs expressions.

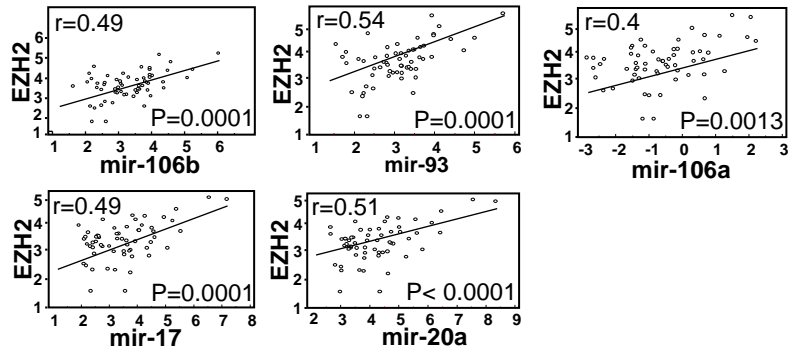

**Supplementary Figure 8.** Inhibitory effects of betulinic acid on MDA-MB-231 cell growth.

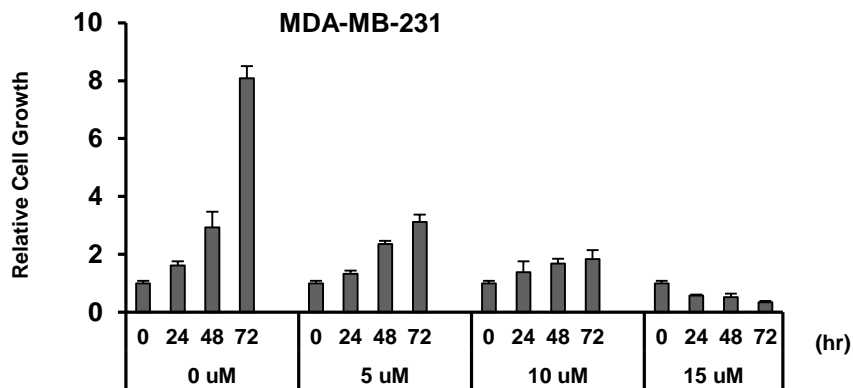

**Supplementary Figure 9. Pearson's correlation analysis using two independent breast cancer patient data sets. EZH2 expression is inversely correlated with ZBTB4 expression.**

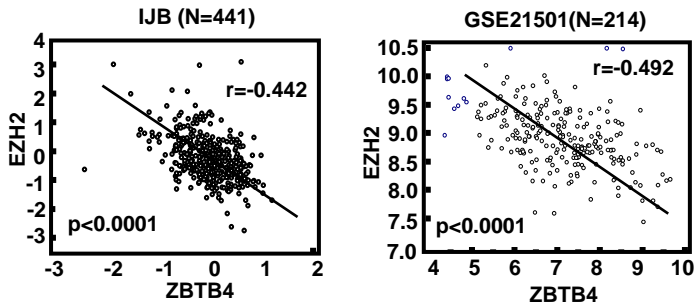

**Supplementary Figure 10. Kaplan-Meier Survival analysis(EZH2<sup>high</sup>ZBTB4<sup>low</sup> vs. EZH2<sup>low</sup>ZBTB4<sup>high</sup> groups). The EZH2<sup>high</sup>ZBTB4<sup>low</sup> group exhibit more significantly poor clinical outcome than EZH2<sup>low</sup>ZBTB4<sup>high</sup> Patient group.**

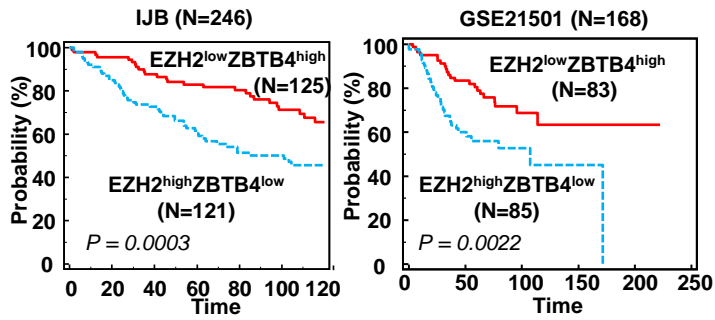

Supplement: mmc1.pdf [file mmc1.pdf]
